# Supplementary material
Source: publisher figshare collection journal article supplement (https://sage.figshare.com/ndownloader/files/21622581)
Supplement: Supplementary file 1 [file 21622581]

Table 1 for doi: 10.1177/0739456X20903362

| Episode      | Concepts Used                                                                                                                                                                                                                                                                                                                                                                               | Graphic Representations                                                                                                                                                                                                                                                                              | Key Locations                                                                                                                                                                                                                                                                                                                                                                                                                              |
|--------------|---------------------------------------------------------------------------------------------------------------------------------------------------------------------------------------------------------------------------------------------------------------------------------------------------------------------------------------------------------------------------------------------|------------------------------------------------------------------------------------------------------------------------------------------------------------------------------------------------------------------------------------------------------------------------------------------------------|--------------------------------------------------------------------------------------------------------------------------------------------------------------------------------------------------------------------------------------------------------------------------------------------------------------------------------------------------------------------------------------------------------------------------------------------|
| Walking      | <ul style="list-style-type: none"> <li><b>Pace</b><br/>Fast vs. Slow</li> <li><b>Path</b><br/>Regular Path vs. Detour</li> <li><b>Personality</b><br/>Introvert vs. Extrovert</li> <li><b>Purpose</b><br/>With vs. Without</li> </ul>                                                                                                                                                       | 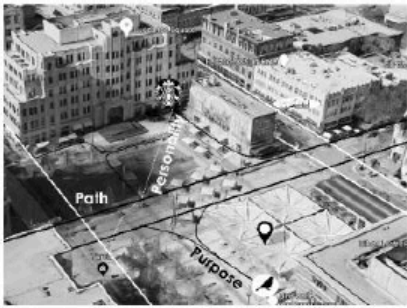                                                                                                                                                                                                                   | <ul style="list-style-type: none"> <li><b>Downtown</b> (Dallas, Fort Worth, Arlington)</li> <li><b>Park</b> (Dallas, Arlington)</li> <li><b>Neighborhood</b> (Dallas, Arlington, Irving, Southlake, Ranaoke)</li> <li><b>Mall</b> (Dallas, Grand Prairie)</li> <li><b>Educational Campus</b> (UTA)</li> <li><b>Medical Campus</b> (Plano)</li> </ul>                                                                                       |
| Observing    | <ul style="list-style-type: none"> <li><b>Segregation</b><br/>Inclusive vs. Exclusive</li> <li><b>Gentrification</b><br/>Housing; New businesses; Non-essentials</li> <li><b>Sense of City</b><br/>Inclusive; Stable</li> <li><b>Resources</b><br/>Budget; Connectivity; Construction Quality</li> </ul>                                                                                    |  <div style="display: flex; justify-content: space-around; margin-top: 5px;"> <span>Gentrification</span> <span>Resources</span> <span>Sense of City</span> <span>Resources</span> <span>Segregation</span> </div> | <ul style="list-style-type: none"> <li><b>Downtowns</b> (Fort Worth, Arlington)</li> <li><b>Neighborhoods</b> (Dallas, Arlington, Pantego, Southlake, Frisco, Irving)</li> <li><b>Park</b> (Arlington, Fort Worth)</li> <li><b>Historical District</b> (Dallas, Fort Worth)</li> <li><b>Educational Campus</b> (UTA, TCC)</li> </ul>                                                                                                       |
| Encountering | <ul style="list-style-type: none"> <li><b>Rules</b><br/>Unspoken vs. Spoken</li> <li><b>Reactions</b> (to encountering)<br/>Personal; Physical; Social</li> <li><b>Results</b><br/>Transgressions; Avoidance; Adjacency; Interaction</li> <li><b>Relations</b> (with)<br/>People; Place; Entities</li> <li><b>Reasons</b> (for encountering)<br/>Unexpected; Unplanned; Informal</li> </ul> |                                                                                                                                                                                                                   | <ul style="list-style-type: none"> <li><b>Plaza</b> (Dallas, Fort Worth)</li> <li><b>Park</b> (Dallas, Addison)</li> <li><b>Pedestrian Bridge</b> (Dallas)</li> <li><b>Special Districts</b> (Art District, Dallas; Entertainment District, Arlington; Farmers Market, Dallas; Zoo, Fort Worth)</li> <li><b>Suburban Mall</b> (Hurst, Arlington)</li> <li><b>Educational Campus</b> (UTA)</li> <li><b>Homelessness</b> (Dallas)</li> </ul> |
| Perceiving   | <ul style="list-style-type: none"> <li><b>Diversity</b><br/>Hip; Gayborhood; Uptown; etc.</li> <li><b>Temporal</b><br/>Transient vs. Permanent</li> <li><b>Option</b><br/>Crime; Poverty; High-end; Wealth</li> <li><b>Biases</b><br/>Political; Economic; Geographic</li> <li><b>Image</b><br/>Outsider vs. Insider</li> </ul>                                                             |                                                                                                                                                                                                                  | <ul style="list-style-type: none"> <li><b>The Metroplex</b></li> <li><b>Student's Hometown</b> (Dallas, Arlington, Southlake, Diamond Hill, Irving, Haltom City, Richardson, Fort Worth)</li> <li><b>Educational Campus</b> (UTA)</li> <li><b>Immigrant Lives</b> (Chinese)</li> </ul>                                                                                                                                                     |
| Interpreting | <ul style="list-style-type: none"> <li><b>Breaks</b><br/>Cultural; Grid</li> <li><b>Skyline</b><br/>Iconic vs. Change</li> <li><b>Boundaries</b><br/>Districts</li> <li><b>Mental Image</b></li> </ul>                                                                                                                                                                                      |                                                                                                                                                                                                                  | <ul style="list-style-type: none"> <li><b>Downtown</b> (Dallas, Fort Worth)</li> <li><b>City</b> (Dallas, Fort Worth, Arlington, Denton, Carrollton, Richardson)</li> <li><b>Educational Campus</b> (UTA)</li> </ul>                                                                                                                                                                                                                       |
